# Supplementary material for: ASCL1 activates neuronal stem cell-like lineage programming through remodeling of the chromatin landscape in prostate cancer
Source: PubMed Central journal article supplement (PMC9046280; doi:10.1038/s41467-022-29963-5), 2022-04-27

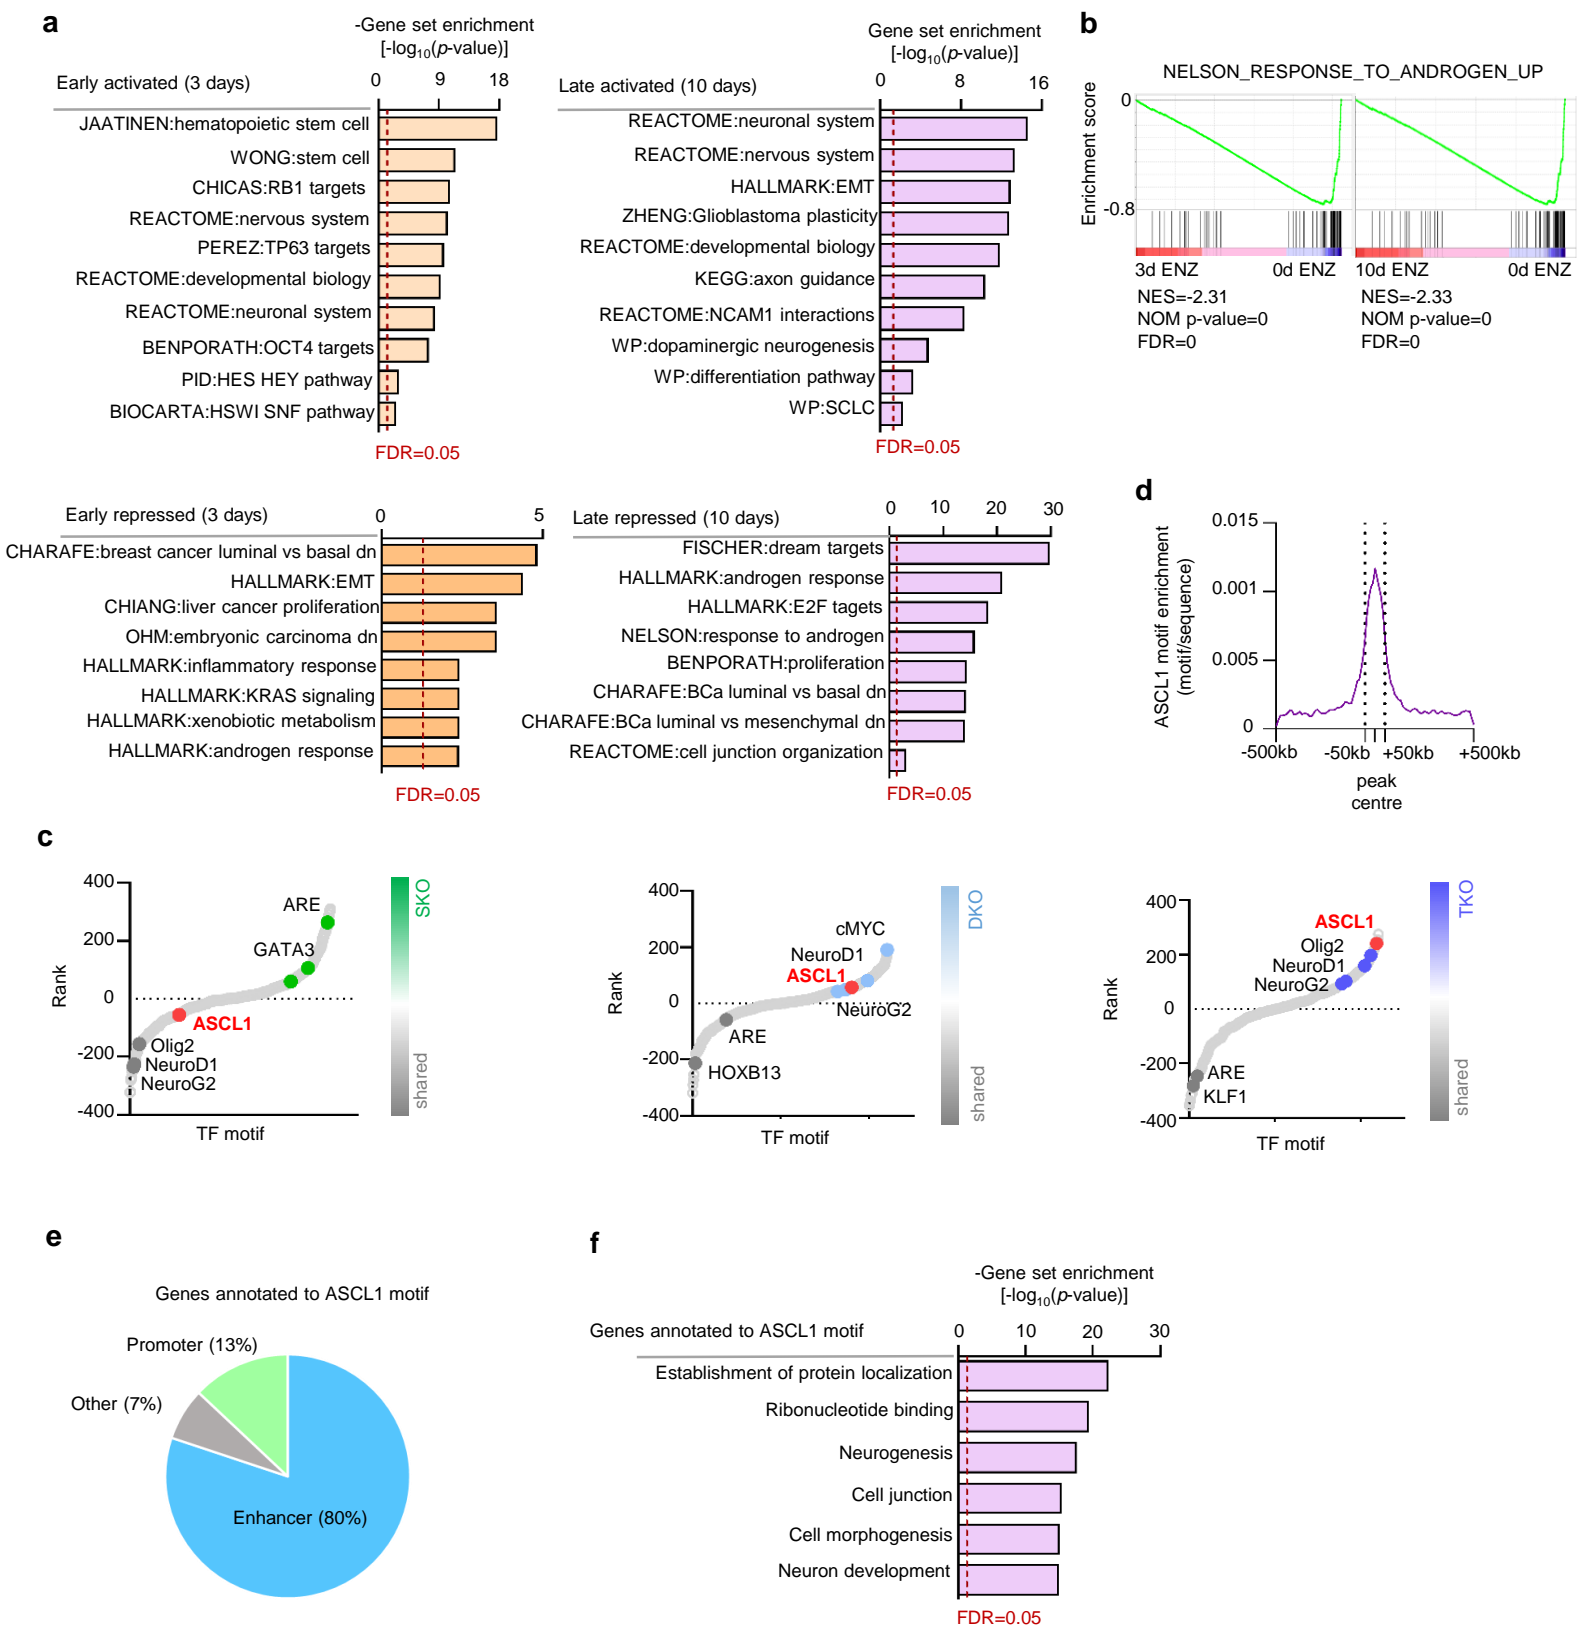

### Supplemental Figure 1

- Integrating ATACseq and RNAseq, gene set enrichment analysis (GSEA) was used to assess the transcriptional response to enzalutamide (ENZ) treatment in 16D<sup>CRPC</sup> cells (3 or 10 days treated with ENZ vs. 16D<sup>CRPC</sup> non-treated) presented as: early repressed; late repressed; early activated; late activated. Dotted line represent false discovery rate (FDR)=0.05 and  $p < 0.05$ . Statistical analysis was performed using a hypergeometric test ( $n=1$  biological sample).
- GSEA shows loss of canonical androgen receptor (AR) signaling<sup>76</sup> after ENZ-treatment in 16D<sup>CRPC</sup>.  $p < 0.05$ , statistical analysis was performed using a cumulative hypergeometric test.
- Transcription factor (TF) binding motifs surrounding accessible chromatin in unique vs. shared regions, ranked based on differential p-value in PB-Cre4:Pten/f/f (single knockout (SKO)) and PB-Cre4:Pten/f/f;Rb1f/f (double knockout (DKO)) and Cre4:Pten/f/f;Rb1f/f;TP53f/f (triple knockout (TKO)) genetic engineered mouse models (GEMMs)<sup>14</sup>. Each dot represents a motif. Statistical analysis was performed using a cumulative hypergeometric test.
- Enrichment of ASCL1 motif at accessible peak center (accessible region define as  $\pm 50$ kb from peak center).
- Genomic annotation for genes associated with ASCL1 motif shown as percentage of all peaks.
- Gene set enrichment analysis shows Gene Ontology (GO) pathways associated to genes annotated to ASCL1 motif in 10 days ENZ treated 16D<sup>CRPC</sup>. Dotted line represents FDR=0.05 and  $p < 0.05$ , statistical analysis was performed using a hypergeometric test.

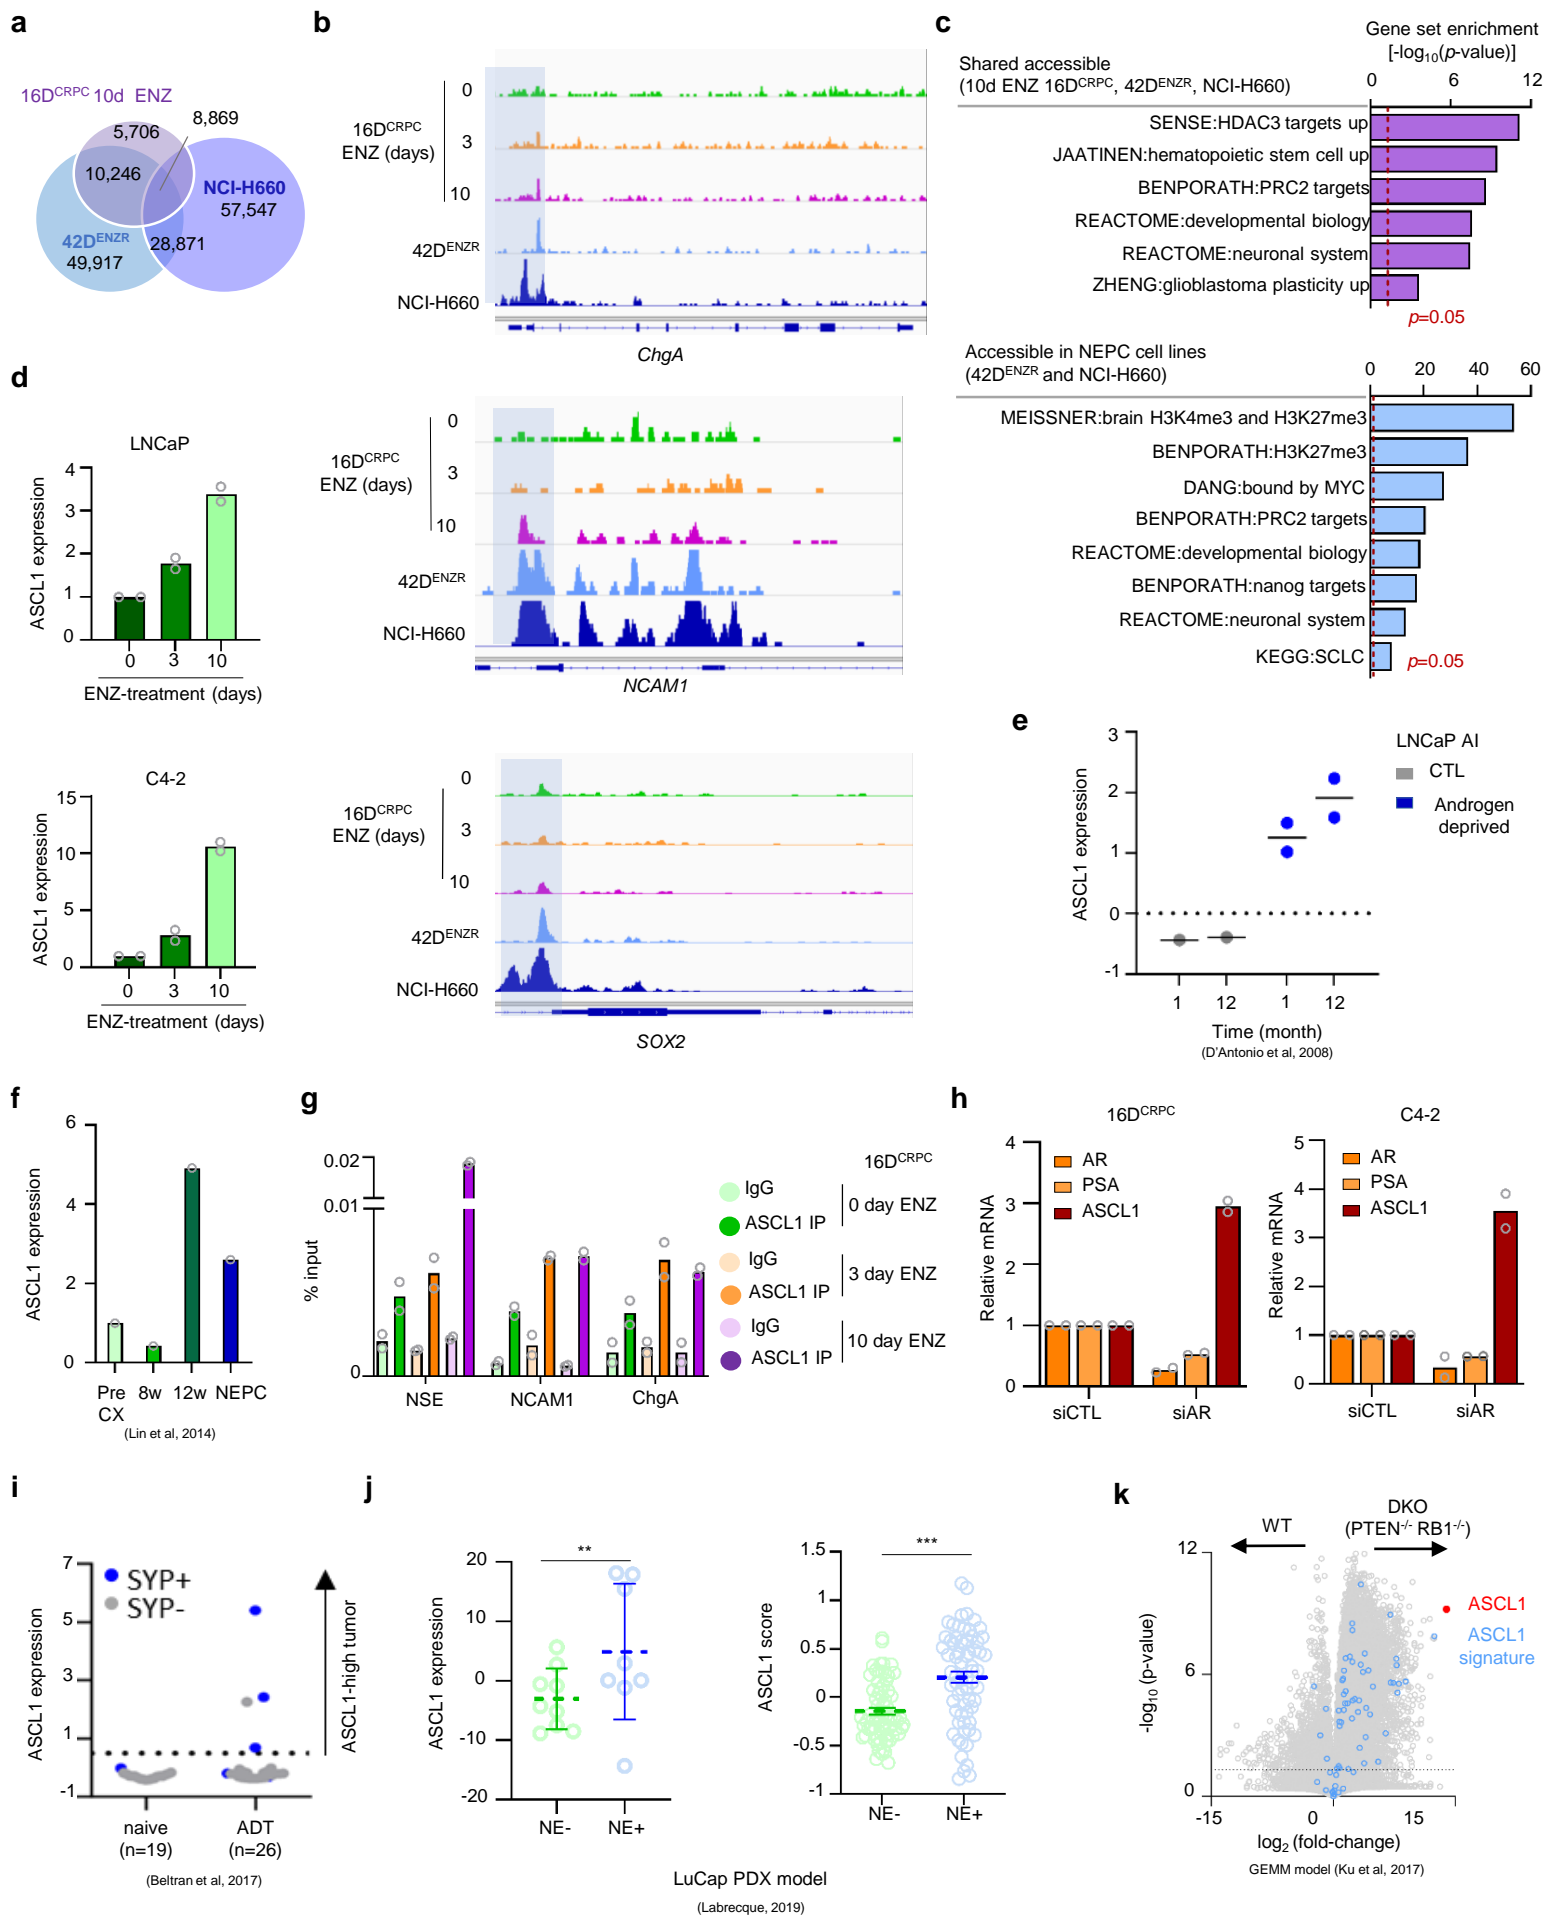

Supplemental Figure 2 – see next page for caption

## Supplemental Figure 2

- a) Venn diagram shows chromatin accessibility distribution. Data presented as number of regions.
- b) Epigenomic alterations shows chromatin accessibility in genetic loci of *CHGA*, *NCAM1* and *SOX2* across ENZ-treated 16D<sup>CRPC</sup> and neuroendocrine prostate cancer (NEPC). Data visualized using IGV .
- c) Pathways associated with shared accessible (top) and NEPC regions (bottom). Dotted line represents  $p=0.05$ , statistical analysis was performed using a hypergeometric test.
- d) Relative mRNA normalized to GAPDH (n=2 biologically independent replicates).
- e) ASCL1 expression reported as  $\log_2\text{FoldChange}^{75}$ .
- f) Relative ASCL1 mRNA expression normalized to pre-castration (pre CX) in LT331 model<sup>19</sup>.
- g) ChIP-PCR shows temporal increase of ASCL1 binding at neuroendocrine genes *CHGA*, *NCAM1* and *NSE*, following ASCL1 over-expression in castration-resistant prostate cancer (CRPC) (0 day), which was enhanced when combined with CSS+ENZ over a time course of 3 and 10 days (n=2 biologically independent samples). Data visualized using IGV.
- h) CRPC siAR presented as relative mRNA normalized to GAPDH (n=2 biologically independent samples).
- i) High ASCL1 expressing tumors exhibit high SYP expression. Data reported as z-score<sup>15</sup>.
- j) ASCL1 expression reported as  $\log_2\text{FPKM mean}\pm\text{SD}$ ,  $p=0.0058$ , NE- n=9 and Ne+ n=8 biologically independent animals (left) ASCL1 activity reported as z-score,  $\text{mean}\pm\text{SEM}$ ,  $p=0.0004$  (right) in LuCaP PDX<sup>12</sup>. Two-tailed unpaired t-test.
- k) ASCL1 expression and activity in DKO vs wild type (WT) GEMMs<sup>14</sup>. Each dot represents a gene, with "ASCL1 signature" (blue) and "ASCL1" (red) highlighted. Dotted line represent  $p\text{-value}=0.05$ . Statistical analysis was performed using a cumulative hypergeometric test.

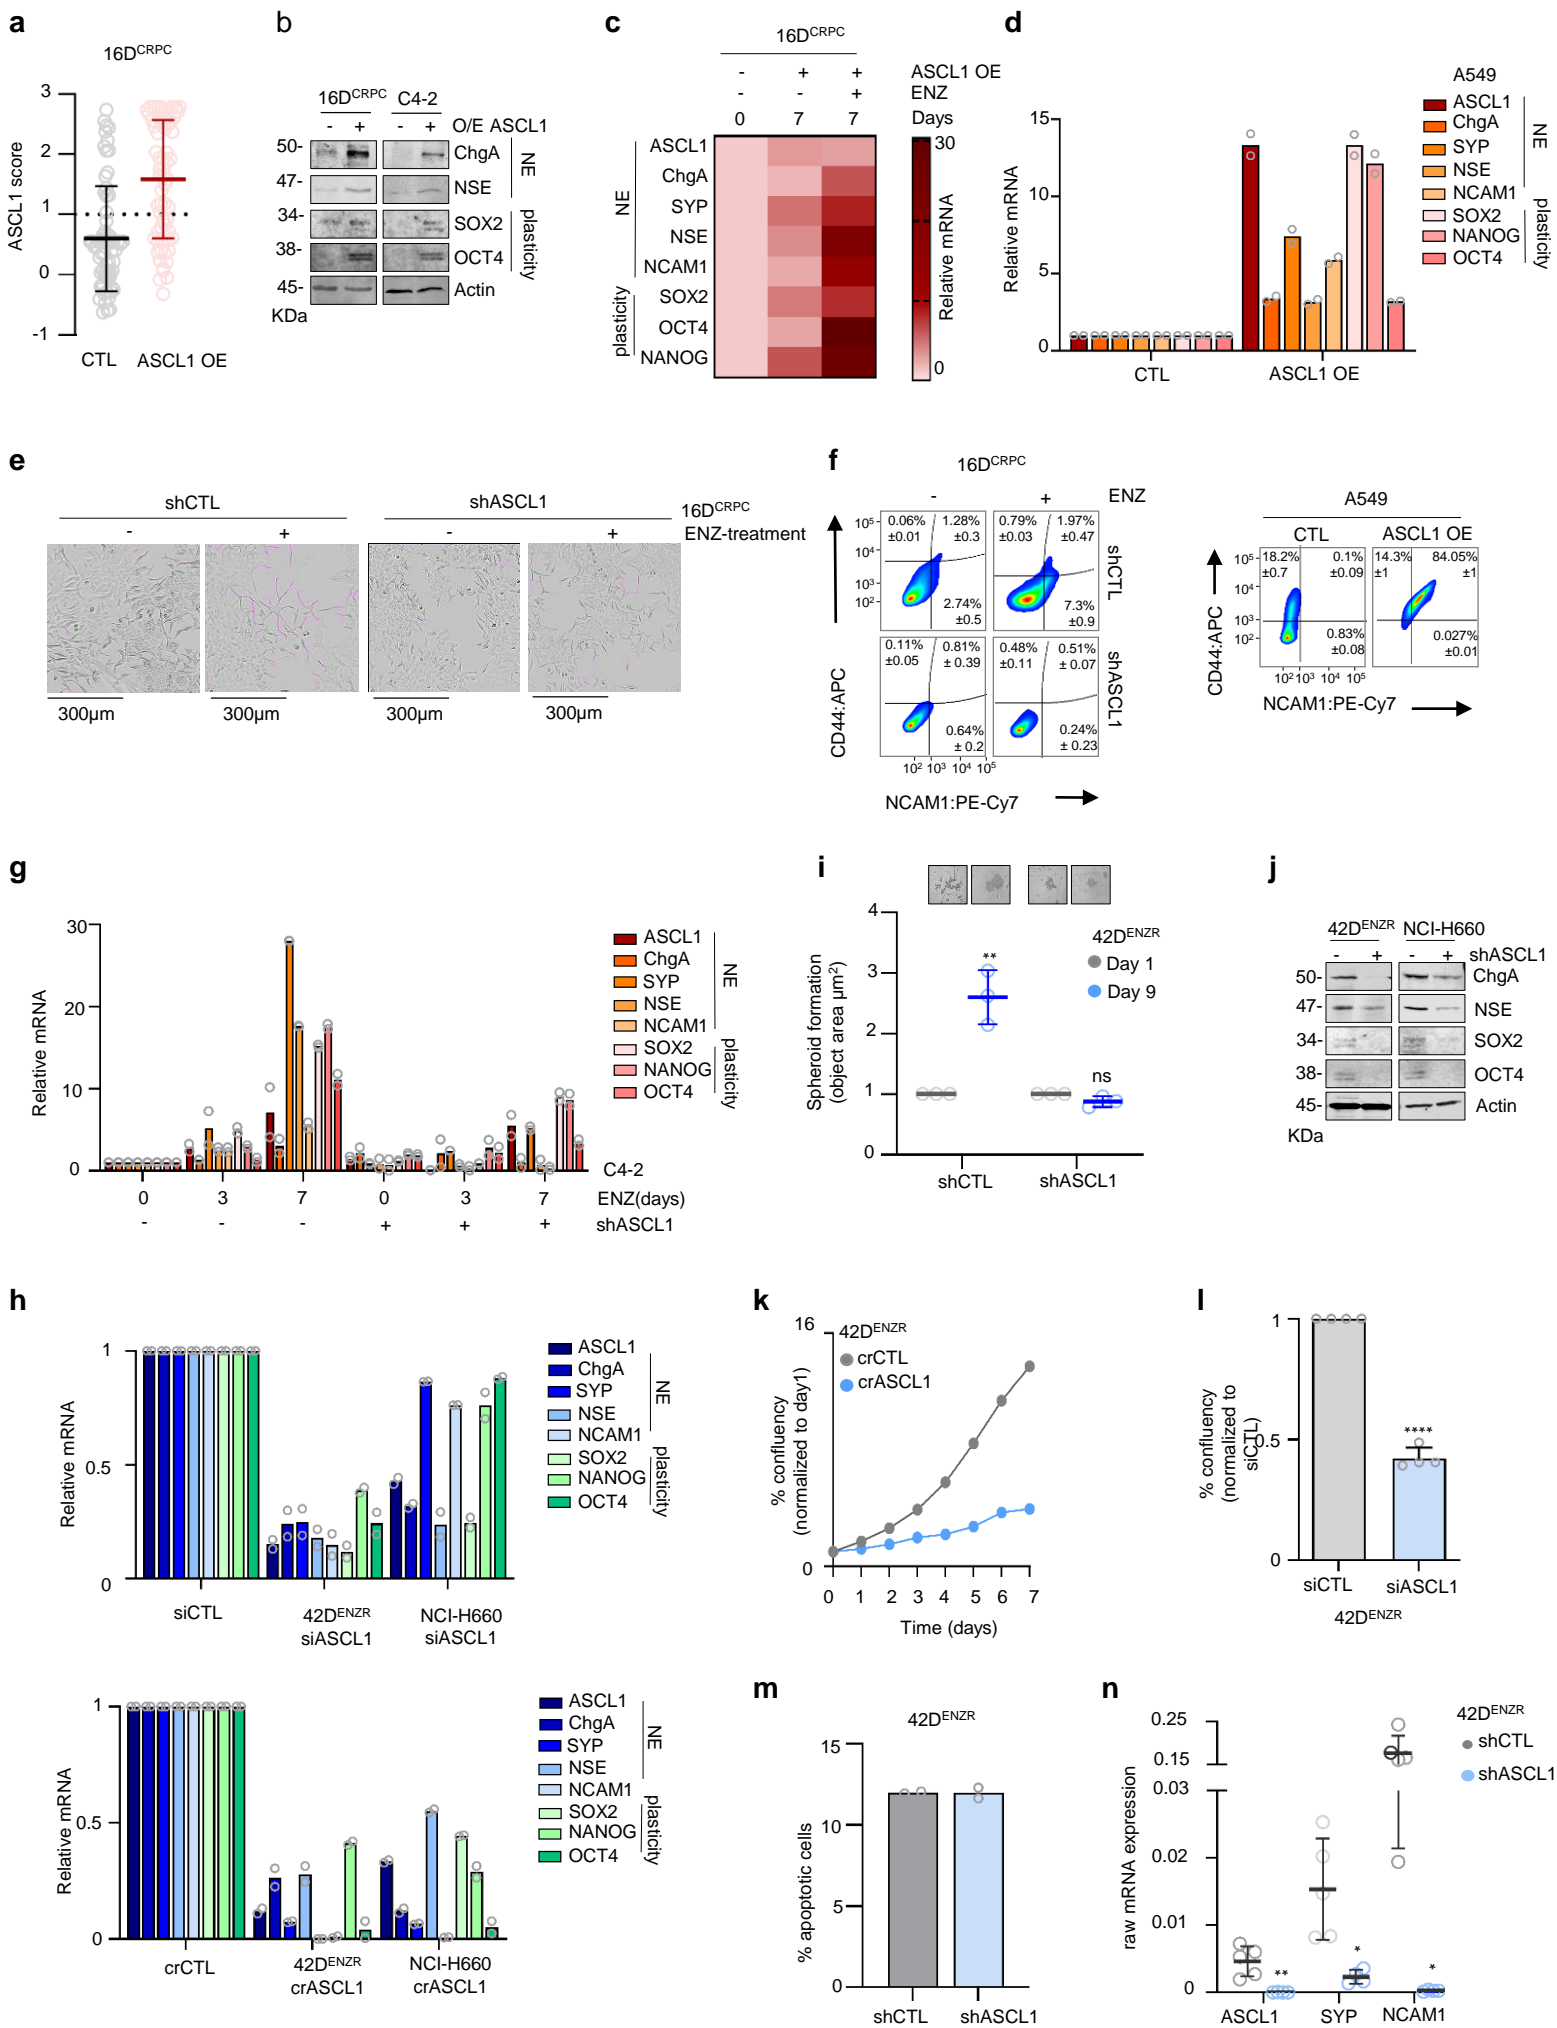

Supplemental Figure 3 – see next page for caption

### Supplemental Figure 3

- a) ASCL1 score reported as z-score mean  $\pm$  SD. (16D<sup>CRPC</sup> CTL n=2 and ASCL1 OE n=1 biologically independent samples).
- b) Western blot shows expression of neuronal (NE) and cancer stem cell (CSC) markers in CRPC overexpressing ASCL1, actin was used as loading control (n=3 biologically independent samples).
- c) ASCL1 overexpression in combination with ENZ (n=2 biologically independent samples).
- d) NE and CSC (up) NCAM1 and CD44 (down) in lung adenocarcinoma cell line A549 overexpressing ASCL1 (n=2 biologically independent samples).
- e) 7-days post-ENZ, "neurite-like extensions" (pink), scale bar=300 $\mu$ m (n=3 biologically independent samples).
- f) NCAM1 and CD44 in 16D<sup>CRPC</sup> shASCL1 7 days post-ENZ (n=2 biologically independent samples).
- g) C4-2 shASCL1 treated with ENZ (n=2 independent samples).
- h) NE and CSC in NEPC siASCL1 (top) and CRISPR ASCL1 (bottom) (n=2 independent samples).
- i) Spheroid formation reported as mean  $\pm$  SD (CTL  $p=0.0032$  and shASCL1  $p=0.0819$ , two-tailed unpaired t-test, n=3 biologically independent samples).
- j) Western blot shows expression of NE and CSC in markers in NEPC shASCL1, actin was used as loading control (n=3 biologically independent samples).
- k) 42D<sup>ENZ</sup> CRISPR ASCL1 proliferation (n=2 biologically independent samples).
- l) 42D<sup>ENZ</sup> siASCL1 proliferation at day 7 reported as mean $\pm$ SD, with  $p$ -value calculated at the end-point,  $p<0.0001$ ; two-tailed unpaired t-test (n=4 biologically independent samples).
- m) Apoptosis reported as percentage of apoptotic cell (n=2 biologically independent samples).
- n) NE mRNA expression in tumors. Each dot represents a mice. Data reported as mean $\pm$ SD, ASCL1  $p=0.0046$ , SYP  $p=0.0113$ , and NCAM1  $p=0.0421$ ; two-tailed unpaired t-test (shCTL n=5 and shASCL1 n=4 biologically independent animal).

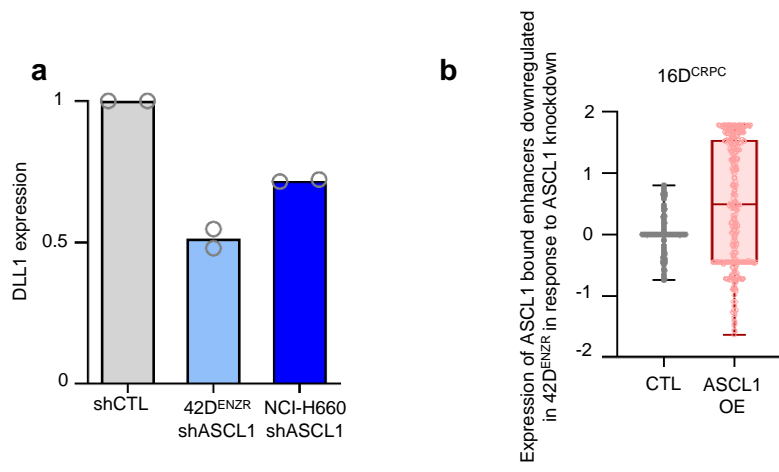

**Supplemental Figure 4**

- a) Relative mRNA expression of DLL1 after knockdown of ASCL1 in 42D<sup>ENZR</sup> and NCI-H660, normalized to GAPDH, presented as (n=2 biologically independent samples).
- b) Increase expression of enhancers (bound by ASCL1 and identified to be downregulated following knockdown of ASCL1) in 16D<sup>CRPC</sup> following over-expression of ASCL1. Data reported as z-score. Box plot shows median as central line, bounds of the box represents quartiles, and whiskers show minimum and maximum value with each dot represent one gene (16D<sup>CRPC</sup> CTL n=2 and ASCL1 OE n=1 biologically independent sample).

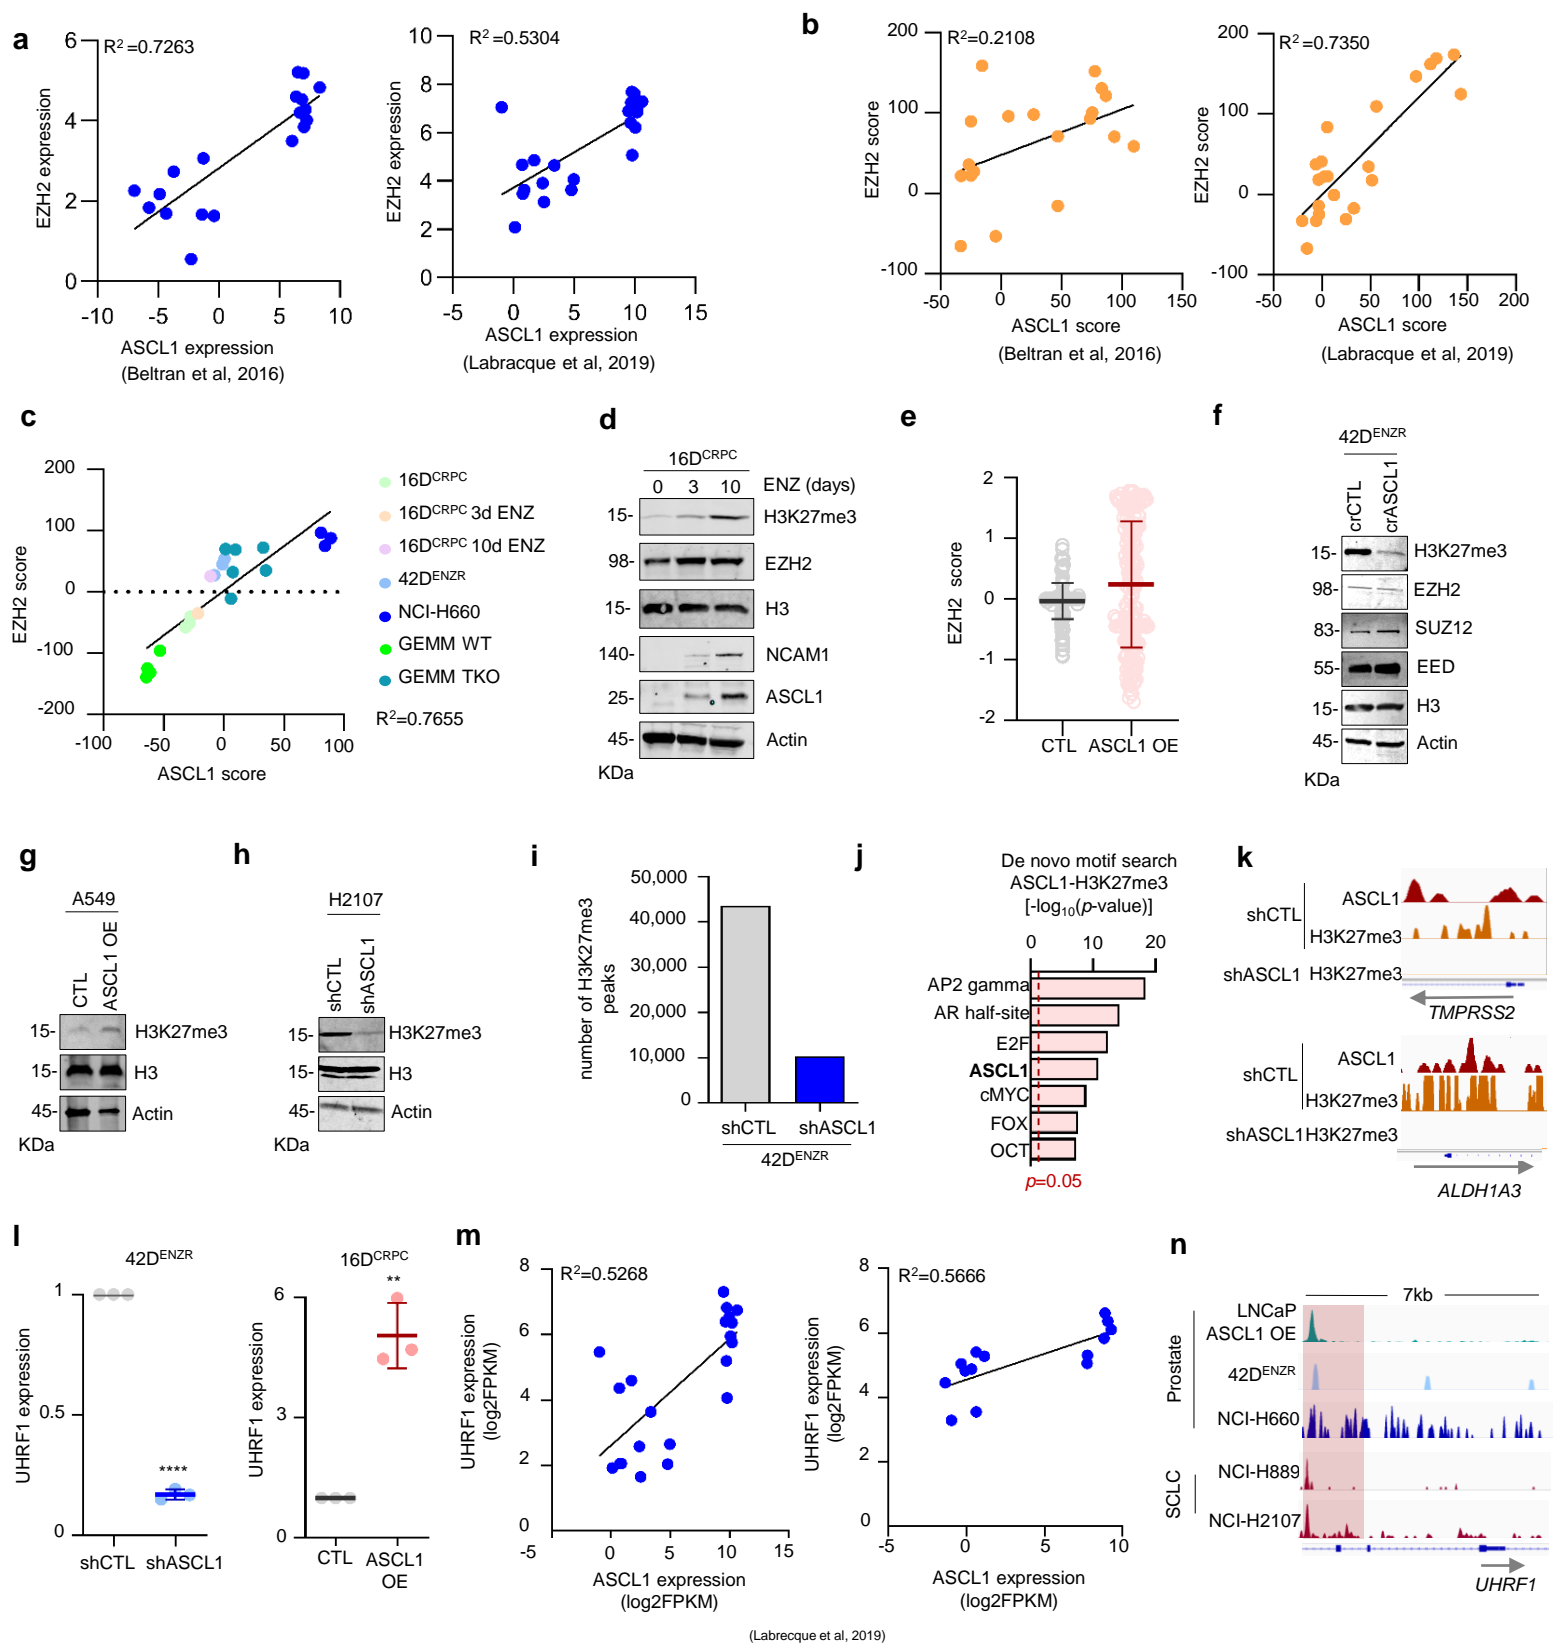

Supplemental Figure 5 – see next page for caption

### Supplemental Figure 5

- a) Correlation between ASCL1 and EZH2 expression reported as z-score in Beltran<sup>15</sup> (right) and Labrecque<sup>12</sup> (left) cohort ( $R^2=0.7263$  and  $R^2=0.5304$ ).
- b) Correlation between ASCL1 and EZH2 custom score reported as z-score in Labrecque<sup>12</sup> (right) and Beltran<sup>15</sup> (left) cohort ( $R^2=0.2108$  and  $R^2=0.7350$ ).
- c) Correlation between ASCL1 and EZH2 in prostate cancer cell lines.
- d) Western blot shows expression of ASCL1 and EZH2 and their target genes in 16D<sup>CRPC</sup> following ENZ treatment, actin and H3 were used as loading controls (n=3 biologically independent samples).
- e) EZH2 score in 16D<sup>CRPC</sup> control and over-expression ASCL1 reported as z-score normalization of each gene, mean $\pm$ SD, CTL=2 and OE=1 biologically independent samples).
- f) Western blot shows Polycomb Repressive complex 2 (PRC2) subunits expression and activity as measured by H3K27me3 in 42D<sup>ENZR</sup> following crASCL1, actin and H3 were used as loading controls (n=3 biologically independent samples).
- g) Western blot shows H3K27me3 expression in lung cancer adenocarcinoma (Adeno), A549 over-expressing ASCL1, actin was used as loading control (n=3 biologically independent samples).
- h) Western blot shows H3K27me3 expression in small-cell lung cancer (SCLC), H2107 shASCL1, actin was used as loading control (n=3 biologically independent samples).
- i) Number of total H3K27me3 peaks in 42D<sup>ENZR</sup> shCTL and shASCL1 generated from ChIPseq (n=1 sample).
- j) ASCL1-H3K27me3 co-bound regions de-novo motif search. Statistical analysis was performed using a hypergeometric test.
- k) Genomic loci shows relative occupation over input of ASCL1 and H3K27me3 at AR/luminal genes (*TAMPRSS2* and *ALDH1A3*) and loss of H3K27me3 at these regions in 42D<sup>ENZR</sup> shASCL1 using IGV.
- l) Expression of UHRF1 reported as log<sub>2</sub>FPKM mean $\pm$ SD, 42D<sup>ENZR</sup>  $p<0.0001$  and 16D<sup>CRPC</sup>  $p=0.0012$ ; two-tailed unpaired t-test (n=3 biologically independent samples).
- m) Correlation between expression of ASCL1 and UHRF1 in Labrecque NEPC patients<sup>12</sup> (left) and in NE positive LuCaP PDX<sup>12</sup> (right) ( $R^2=0.5268$  and  $R^2=0.5666$ ) presented as log<sub>2</sub>FPKM.
- n) ChIPseq of ASCL1 shows binding to enhancer of UHRF1 in prostate and SCLC using IGV.



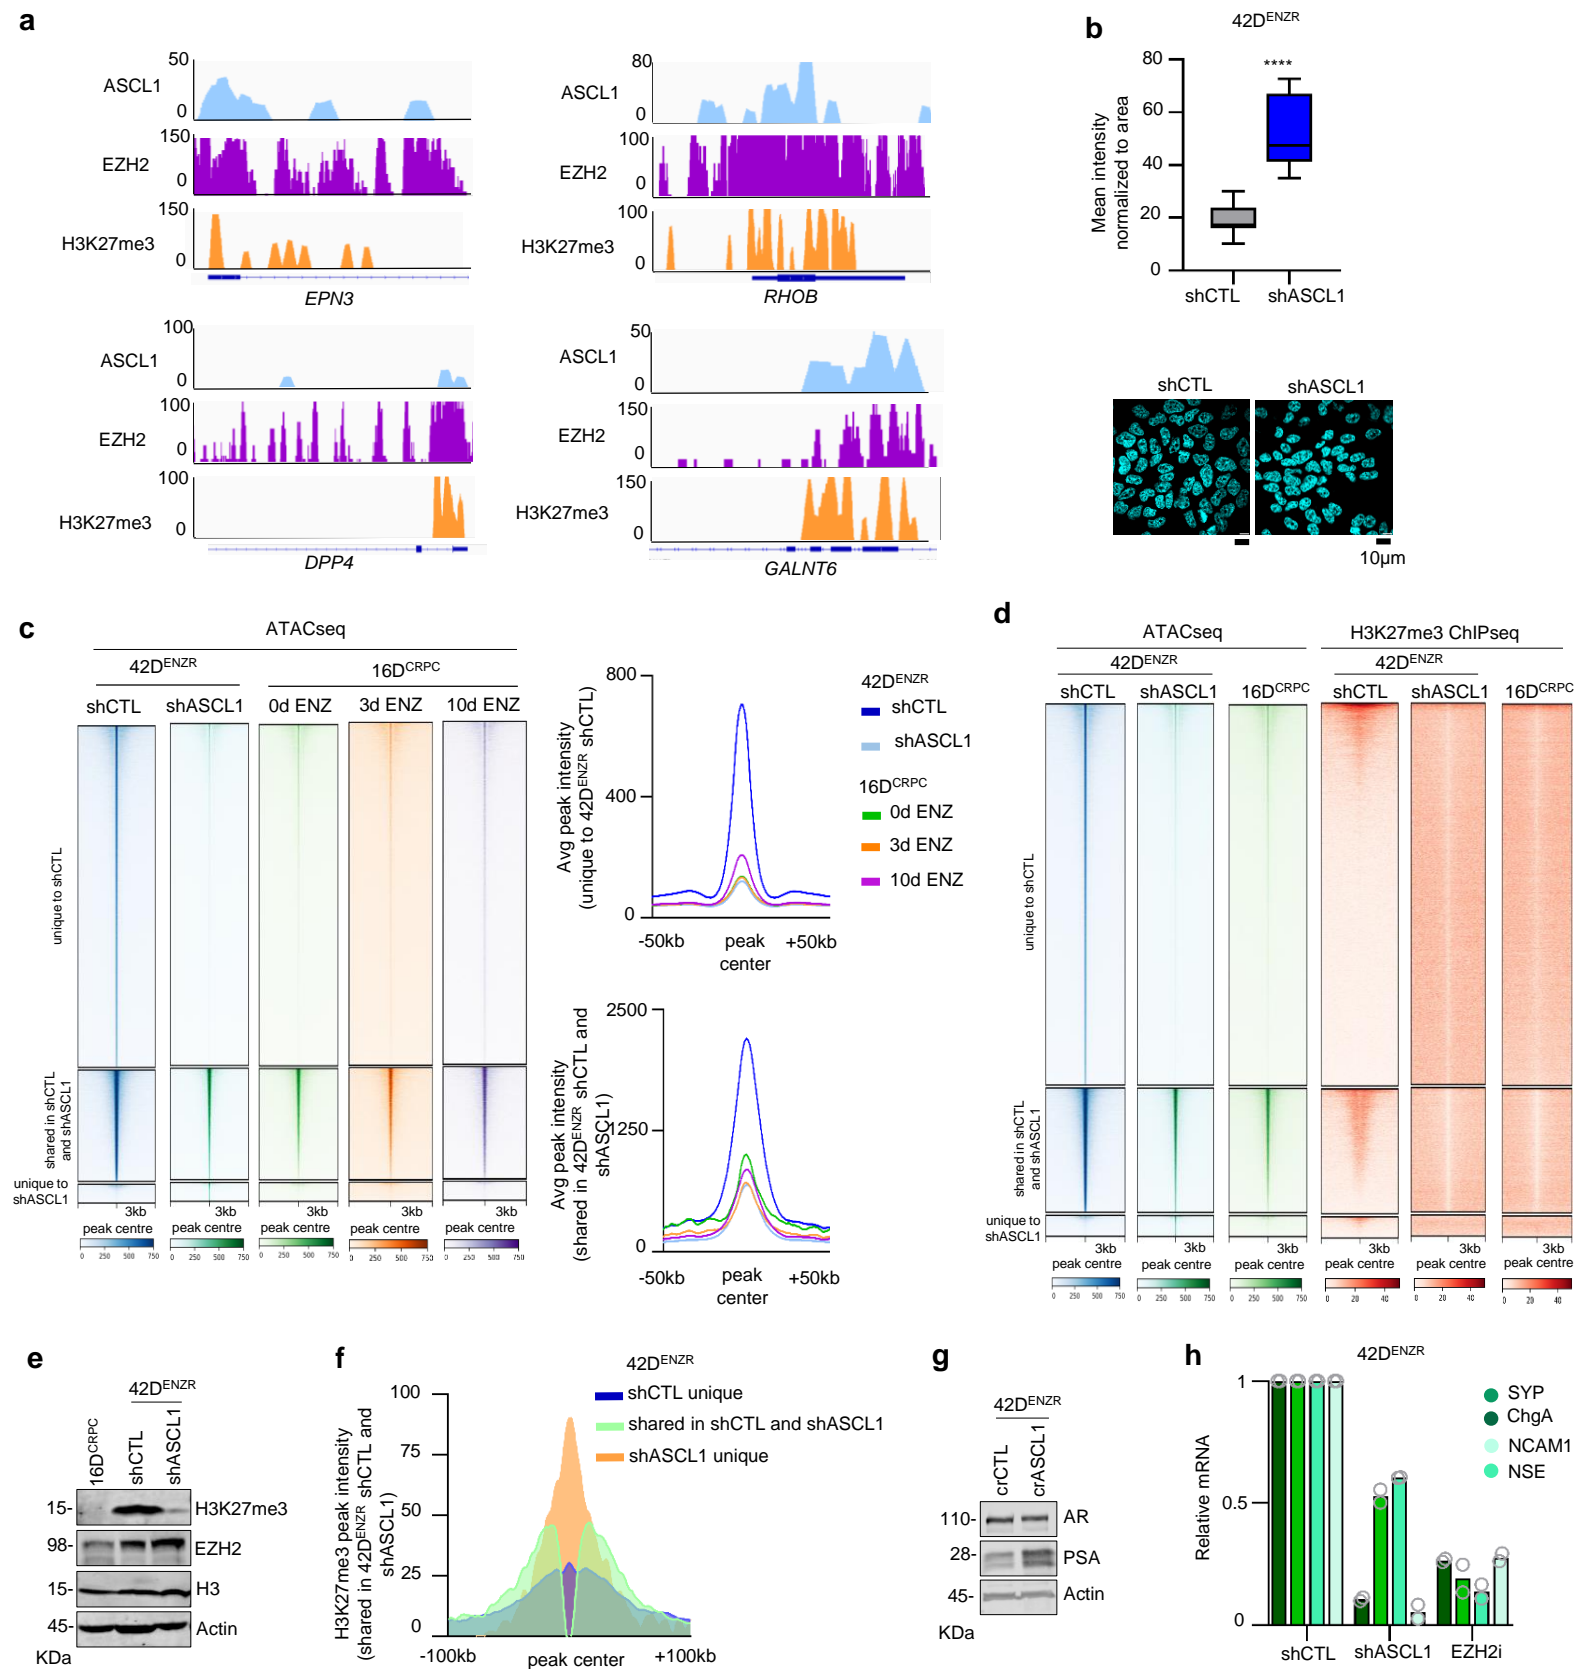

**Supplemental Figure 6**

- Luminal genes co-bound by ASCL1 and EZH2 and are marked with H3K27me3 visualized using IGV.
- Hoechst staining shows chromatin condensation in 42DENZR shASCL1. scale bar=10 $\mu$ m . Box plot shows median as central line, bounds of the box represents quartiles, and whiskers show minimum and maximum value,  $p < 0.0001$ , two-tailed unpaired t-test,  $n = 15$  biologically independent cells).
- Heatmap of chromatin accessible in 42DENZR shCTL and shASCL1; 16DCRPC control and ENZ treatment, presented as 3kb window around the peak center (left) average accessible peak intensity (right).
- Overlaying of H3K27me3 ChIPseq shown as average intensity over input (orange) with ATACseq.
- Western blot shows H3K27me3 expression in CRPC compare to 42DENZR shCTL and shASCL1, with H3 and actin as loading controls ( $n = 3$  biologically independent samples).
- Histogram shows different pattern of H3K27me3 in unique accessible regions in control 42DENZR or shared from ChIPseq.
- Expression of prostate specific antigen (PSA) following CRISPR knockout of ASCL1 in 42DENZR with actin as loading control ( $n = 3$  biologically independent samples).
- Down-regulation of NE markers in 42DENZR with inhibition of EZH2 (EZH2i) or shASCL1. mRNA expression normalized to GAPDH ( $n = 2$  biologically independent samples).

**Supplemental Figure 7. Flow Cytometry Gating.** Flow cytometry gating strategy used in Fig. 3E and Supplementary Data Fig. 3D and 3F.

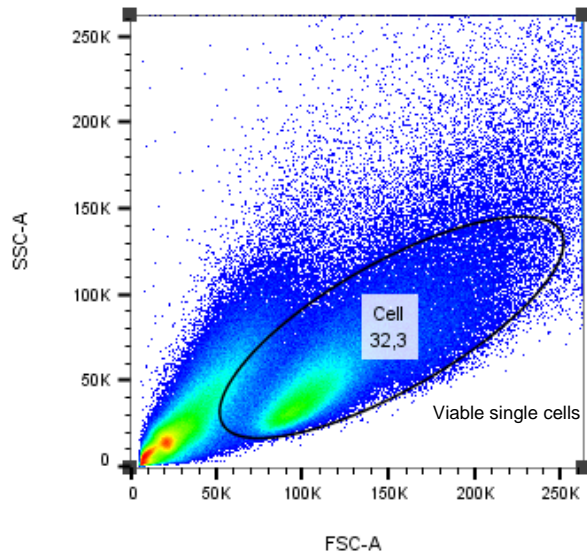

# Supplemental Figure 3

**B**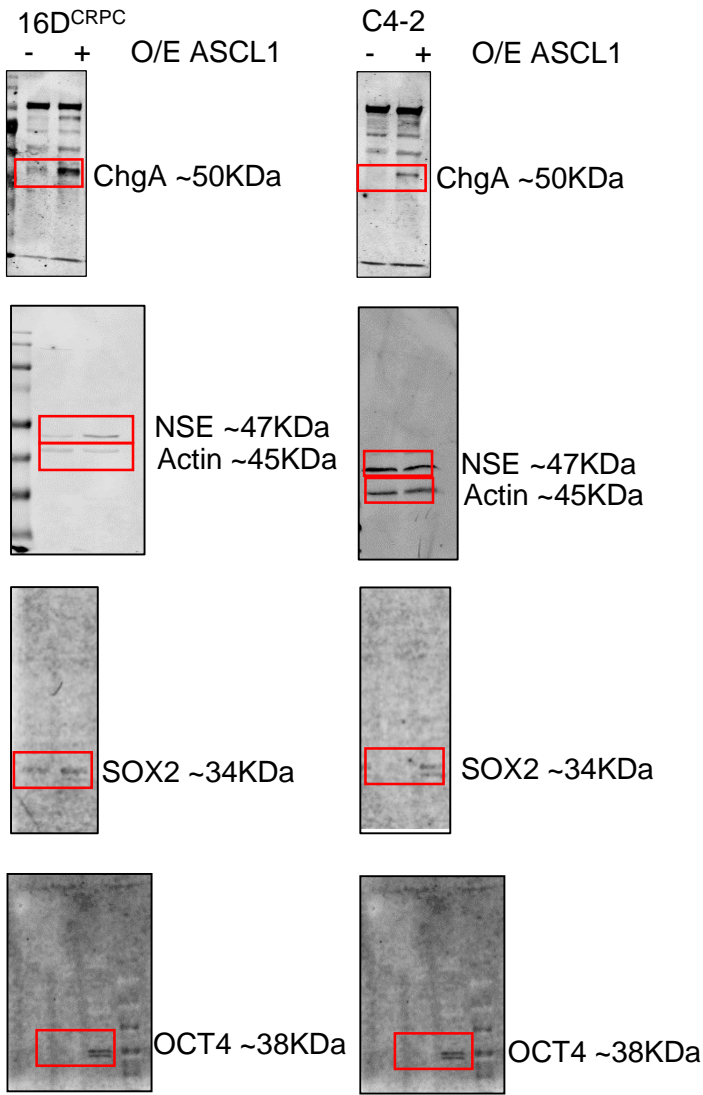**J**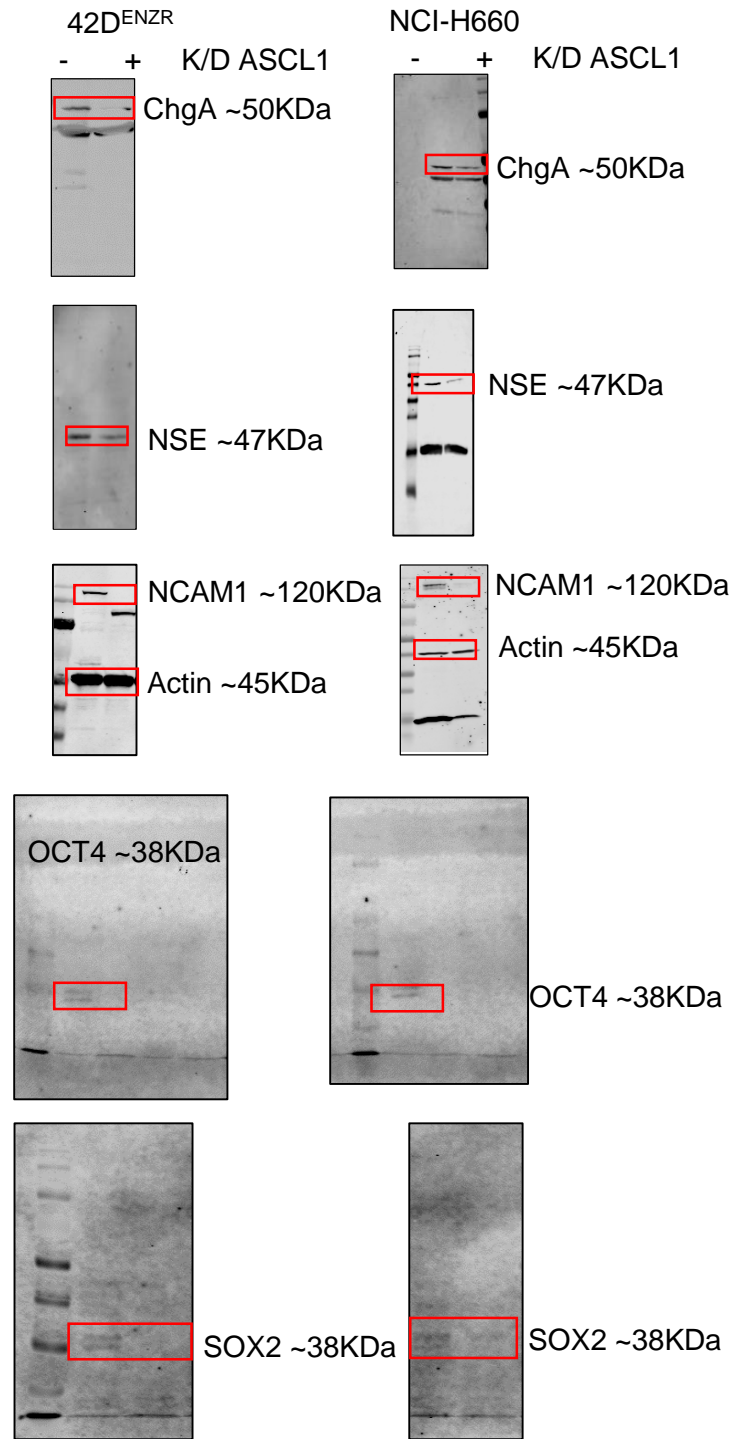

# Supplemental Figure 5

**D**

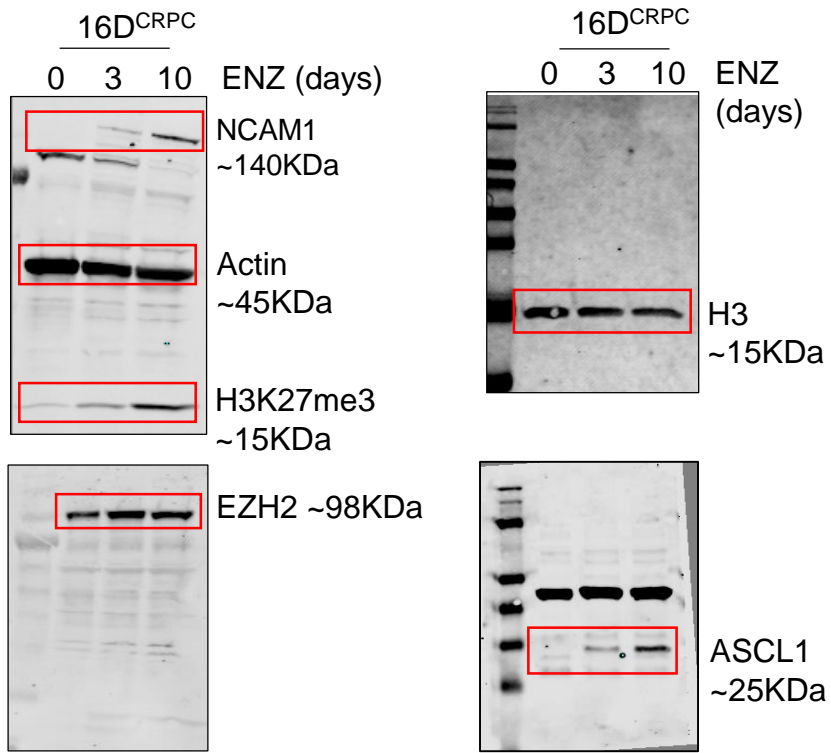

**F**

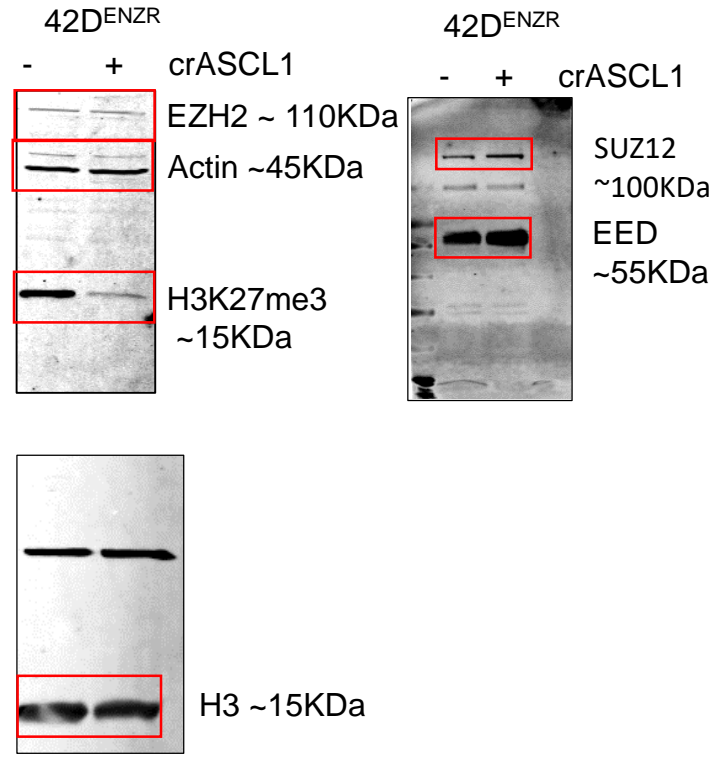

**G**

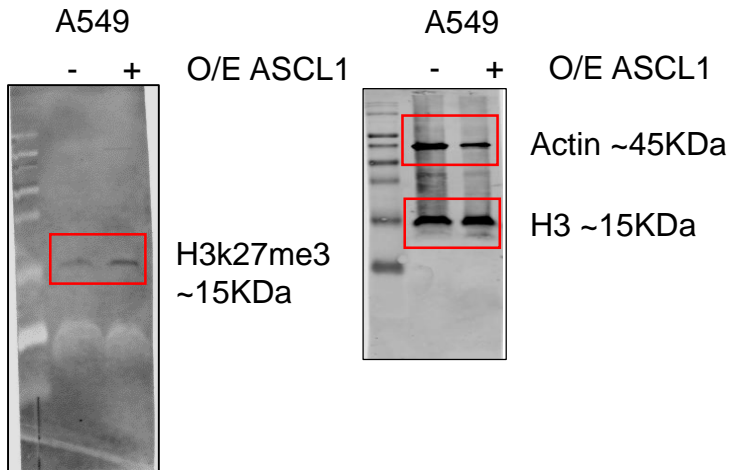

**H**

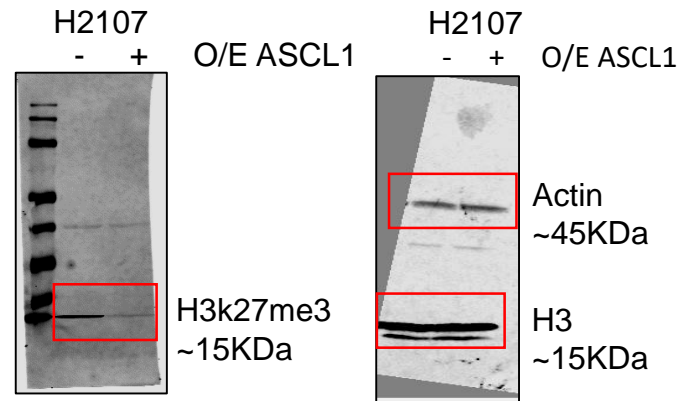

# Supplemental Figure 6

**E**

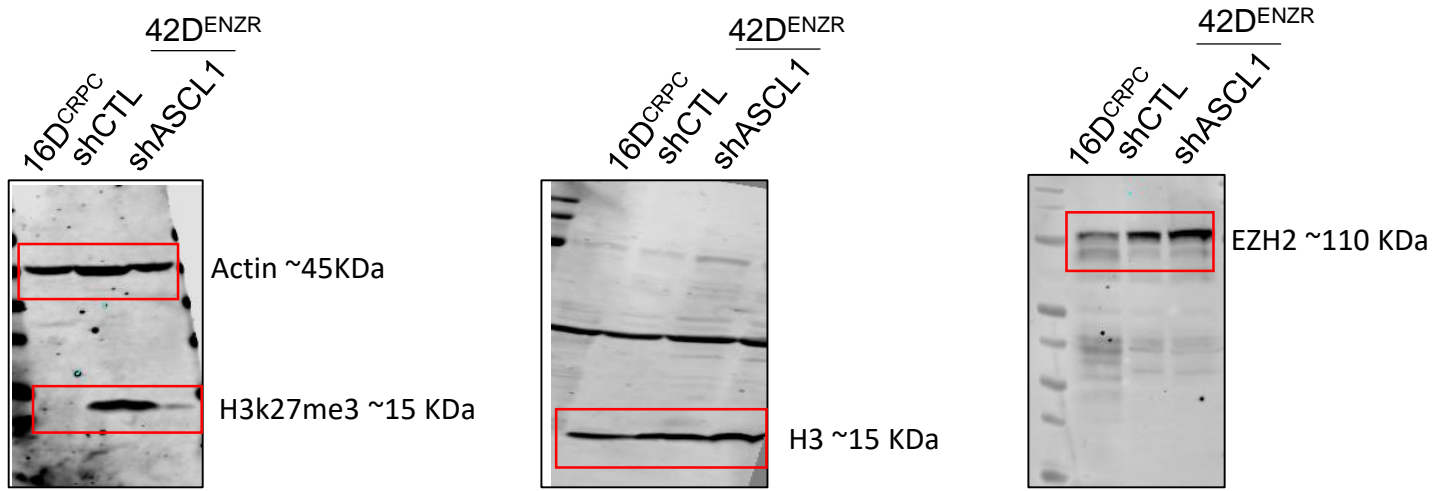

**G**

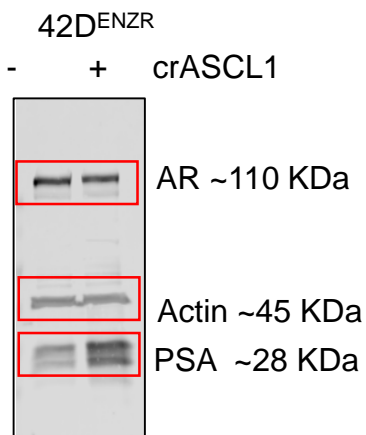

Supplement: 41467_2022_29963_MOESM1_ESM.pdf [file 41467_2022_29963_MOESM1_ESM.pdf]
