# Supplementary material for: ASCL1 activates neuronal stem cell-like lineage programming through remodeling of the chromatin landscape in prostate cancer
Source: PubMed Central journal article supplement (PMC9046280; doi:10.1038/s41467-022-29963-5), 2022-04-27
Supplement: 41467_2022_29963_MOESM2_ESM.pdf [file 41467_2022_29963_MOESM2_ESM.pdf]

## Description of Additional Supplementary Files

1  
2  
3  
4  
5  
6  
7  
8  
9  
10  
11  
12  
13

File Name: Supplementary Data 1

Description: List of abbreviations

File Name: Supplementary Data 2

Description: Ranked TF motifs surrounding accessible peak in 16DCRPC ENZ-treated.

File Name: Supplementary Data 3

Description: Genes annotated to ASCL1 motif in accessible regions unique to 10 days  
ENZ-treated 16D<sup>CRPC</sup>

File Name: Supplementary Data 4

Description: Ranked TF motifs surrounding accessible peak in CPRC ENZ-treated vs  
NEPC
